# Supplementary material for: Support Measures to Estimate the Reliability of Evolutionary Events Predicted by Reconciliation Methods
Source: PubMed Central journal article supplement (PMC3790797; doi:10.1371/journal.pone.0073667), 2013-10-04
Supplement: pone.0073667.s001.pdf [file pone.0073667.s001.pdf]

## Appendix S1

### Formal definition of a reconciliation [5]

**Definition 1.** Consider a gene tree  $G$ , a dated species tree  $S$  such that  $\mathcal{S}(G) \subseteq \mathcal{L}(S)$ , and its subdivision  $S'$ . Let  $\alpha$  be a function that maps each node  $u$  of  $G$  onto an ordered sequence of nodes of  $S'$ , denoted  $\alpha(u) = (\alpha_1(u), \alpha_2(u), \dots, \alpha_\ell(u))$ . Function  $\alpha$  is said to be a reconciliation between  $G$  and  $S'$  if and only if exactly one of the following events occurs for each pair of nodes  $u$  of  $G$  and  $\alpha_i(u)$  of  $S'$  (denoting  $\alpha_i(u)$  by  $x'$  below):

a) if  $x'$  is the last node of  $\alpha(u)$ , one of the cases below is true:

1.  $u \in L(G)$ ,  $x' \in L(S')$  and  $s(x') = s(u)$ ; (C event)
2.  $\{\alpha_1(u_i), \alpha_1(u_r)\} = \{x'_l, x'_r\}$ ; (S event)
3.  $\alpha_1(u_l) = x'$  and  $\alpha_1(u_r) = x'$ ; (D event)
4.  $\alpha_1(u_l) = x'$ , and  $\alpha_1(u_r)$  is any node other than  $x'$  having height  $h(x')$   
or  $\alpha_1(u_r) = x'$ , and  $\alpha_1(u_l)$  is any node other than  $x'$  having height  $h(x')$ ; (T event)

b) otherwise, one of the cases below is true:

5.  $x'$  is an artificial node and  $\alpha_{i+1}(u)$  is its only child; ( $\emptyset$  event)
6.  $x'$  is not artificial and  $\alpha_{i+1}(u) \in \{x'_l, x'_r\}$ ; (SL event)
7.  $\alpha_{i+1}(u)$  is any node other than  $x'$  having height  $h(x')$ . (TL event)

### Proof of Lemma 1

Given a reconciliation  $R$  and an event  $e$ , let  $ind(R, e)$  be the indicator function for  $e$  in  $R$ , i.e.  $ind(R, e) = 1$  if  $e \in \mathbb{E}(R)$  and  $ind(R, e) = 0$  otherwise. Let  $R_A$  be the reconciliation of  $\mathcal{R}$  minimizing

$$\begin{aligned}
 d_a(R_A, \mathcal{R}) &= \sum_{R \in \mathcal{R}} d_a(R_A, R) \\
 &= \sum_{R \in \mathcal{R}} \sum_{e \in \mathbb{E}(R)} (1 - ind(R_A, e)) \\
 &= \sum_{e \in \mathbb{E}(\mathcal{R})} f(e) \cdot |\mathcal{R}| \cdot (1 - ind(R_A, e)) \\
 &= \sum_{R \in \mathcal{R}} |R| - |\mathcal{R}| \sum_{e \in \mathbb{E}(R_A)} f(e)
 \end{aligned} \tag{1}$$

where  $|\mathcal{R}|$  and  $|R|$ , respectively denote the number of reconciliations in  $\mathcal{R}$  and the number of events in a reconciliation  $R$ . The claim for the asymmetric case then follows from the fact that the first sum and the  $|\mathcal{R}|$  factor in (1) are independent of the choice of  $R_A$ .

Now for the symmetric distance, suppose  $R_S$  is a candidate reconciliation for being the symmetric median of  $\mathcal{R}$ , then for every event  $e \in \mathbb{E}(\mathcal{R})$  each  $R \in \mathcal{R}$  containing the event contributes by adding one to  $d_S(R_S, \mathcal{R})$  if  $e \notin \mathbb{E}(R_S)$ , and each  $R \in \mathcal{R}$  not containing the event contributes by adding one if  $e \in \mathbb{E}(R_S)$ . More

precisely, we have

$$\begin{aligned}
d_S(R_S, \mathcal{R}) &= |\mathcal{R}| \sum_{e \in \mathbb{E}(\mathcal{R})} \left( (1 - f(e)) \text{ind}(R_S, e) + f(e)(1 - \text{ind}(R_S, e)) \right) \\
&= |\mathcal{R}| \sum_{e \in \mathbb{E}(\mathcal{R})} f(e) + |\mathcal{R}| \sum_{e \in \mathbb{E}(\mathcal{R})} \left( \text{ind}(R_S, e) \cdot (1 - 2f(e)) \right) \\
&= |\mathcal{R}| \sum_{e \in \mathbb{E}(\mathcal{R})} f(e) + |\mathcal{R}| \sum_{e \in \mathbb{E}(R_S)} \left( 1 - 2f(e) \right) \\
&= \sum_{R \in \mathcal{R}} |R| - 2|\mathcal{R}| \sum_{e \in \mathbb{E}(R_S)} (f(e) - 0.5) \tag{2}
\end{aligned}$$

This holds because  $R_S$  is in  $\mathcal{R}$ . The first summation term and the  $2|\mathcal{R}|$  factor do not depend on the choice of  $R_S$ , hence the reconciliation minimizing  $d_S(R_S, \mathcal{R})$  is that maximizing  $\sum_{e \in \mathbb{E}(R_S)} (f(e) - 0.5)$ .  $\square$

### Proof of Theorem 1

**Proof:** For each node  $v$  of  $\mathcal{G}$ , we introduce the notion of *best local reconciliation support* for  $v$ , denoted  $BLS(v)$ , which corresponds to the maximum support achievable for event nodes of a subtree rooted at  $v$  and belonging to a reconciliation tree:

$$BLS(v) = \max_{\substack{T \in \mathcal{T}, \\ v \in V_e(T)}} \left( \sum_{w \in V_e(T_v)} f_{\mathcal{G}}(w) \right) \tag{3}$$

We will now show that  $SCORE(v) = BLS(v)$ , for each node  $v \in V(\mathcal{G})$ , which will prove the theorem as *i)* each root of  $\mathcal{G}$  corresponds to the root of a reconciliation tree; *ii)* there is a bijection between  $\mathbb{E}(R)$  and  $V_e(T_R)$ ; i.e. line 11 will then be shown to return a suitable reconciliation tree.

The proof that  $SCORE(v) = BLS(v)$  for each node  $v \in V(\mathcal{G})$  proceeds by induction on the height of  $v$ . If  $h(v) = 0$ , by construction of  $\mathcal{G}$ ,  $v$  is an event node such that  $e(v) = \mathbb{C}$  [18] and, by line 8 of Algorithm 1,  $SCORE(v) = f_{\mathcal{G}}(v) = BLS(v)$ , as  $v$  has no child here. Let us now suppose that  $SCORE(u) = BLS(u)$ , for each node  $u \in V(\mathcal{G})$  with  $h(u) < h_i$  and let  $v$  be a node in  $\mathcal{G}$  such that  $h(v) = h_i$ . Note that, if  $v$  is an event node, from Condition  $C_4$  of Definition 5 of [18], each reconciliation tree in  $\mathcal{T}$  containing  $v$  also contains all child nodes of  $v$  (that have a height strictly smaller than  $h_i$ ). Thus:

$$\begin{aligned}
BLS(v) &= \max_{\substack{T \in \mathcal{T}, \\ v \in V_e(T)}} \left( \sum_{w \in V_e(T_v)} f_{\mathcal{G}}(w) \right) = f_{\mathcal{G}}(v) + \sum_{u \in \text{ch}(v)} \max_{\substack{T \in \mathcal{T}, \\ u \in V_e(T)}} \left( \sum_{w \in V_e(T_u)} f_{\mathcal{G}}(w) \right) \\
&= f_{\mathcal{G}}(v) + \sum_{u \in \text{ch}(v)} BLS(u) = f_{\mathcal{G}}(v) + \sum_{u \in \text{ch}(v)} SCORE(u) = SCORE(v)
\end{aligned}$$

where these equalities hold by definition of  $BLS(v)$ , by induction and by line 8 of Algorithm 1. On the contrary, if  $v$  is a mapping node, from Condition  $C_5$  of Definition 5 in [18], each reconciliation tree from  $\mathcal{T}$  containing  $v$  also contains exactly one child node of  $v$ . Hence,  $BLS(v) = \max_{u \in \text{ch}(v)} BLS(u) = \max_{u \in \text{ch}(v)} SCORE(u) = SCORE(v)$ , which holds by definition of  $BLS(v)$ , by induction and by line 10 of Algorithm 1. This concludes the proof that  $SCORE(v) = BLS(v)$  for each node  $v \in V(\mathcal{G})$  and thus ensures that node  $r$  selected on line 11 of Algorithm 1 maximizes  $BLS(\cdot)$  among all roots of  $\mathcal{G}$ .

Algorithm 2 simply traverses  $\mathcal{G}$  starting from the root node  $r(T_A)$  of an optimal reconciliation tree  $T_A$  and identifies all other nodes of  $T_A$ . Indeed, the subset of nodes selected by Algorithm 2 satisfies all conditions

of Definition 5 of [18], and can thus be proved to be a valid reconciliation tree  $T_A$  using a proof similar to that of Theorem 1 of [18]. Moreover, it is straightforward to see that  $BLS(r(T_A)) = \sum_{w \in V_e(T_A)} f_{\mathcal{G}}(w)$  and, since all reconciliation trees in  $\mathcal{T}$  are rooted at roots of  $\mathcal{G}$  [18], this concludes the proof.  $\square$
